# Supplementary material for: Exposure to a Low-Oxygen Environment Causes Implantation Failure and Transcriptomic Shifts in Mouse Uteruses and Ovaries
Source: MDPI journal article supplement (doi:10.3390/biomedicines12051016), 2024-05-05
Supplement: s1 [file s1]

**A**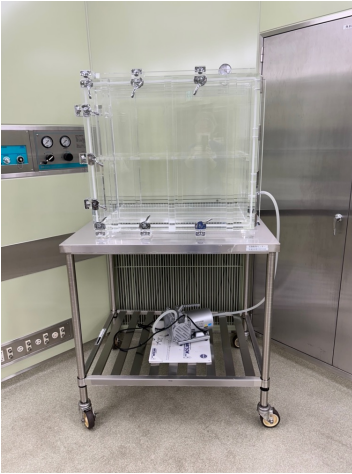**B**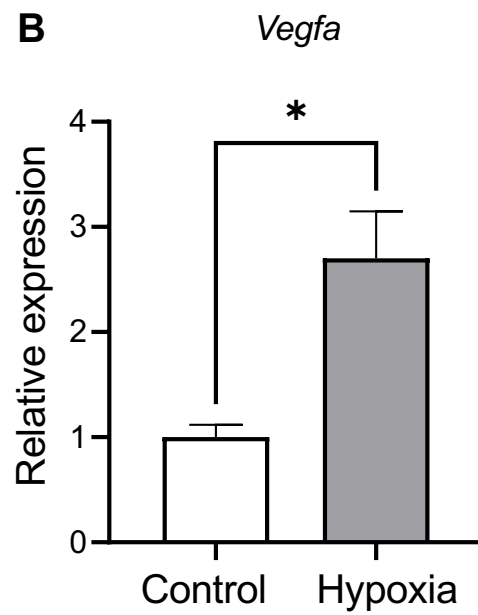**C**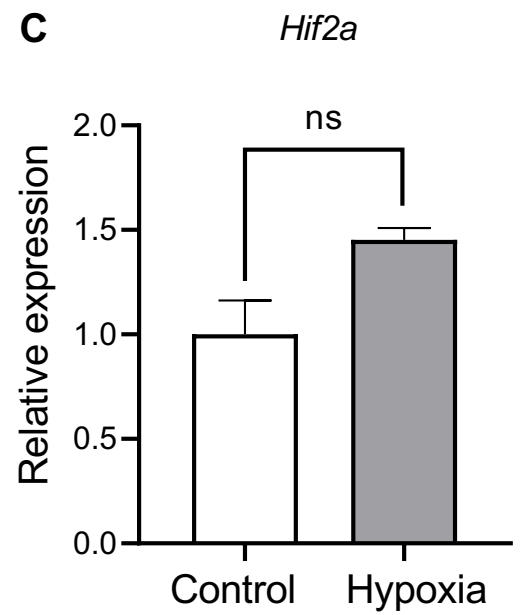

**Figure S1:** (A) Arrangements of the chamber and the pump. (B) *Vegfa* and (C) *Hif-2 $\alpha$*  transcript levels in control and hypoxic groups of mouse uterus at GD1.5. \*  $p < 0.05$ , ns: not significant.

**A**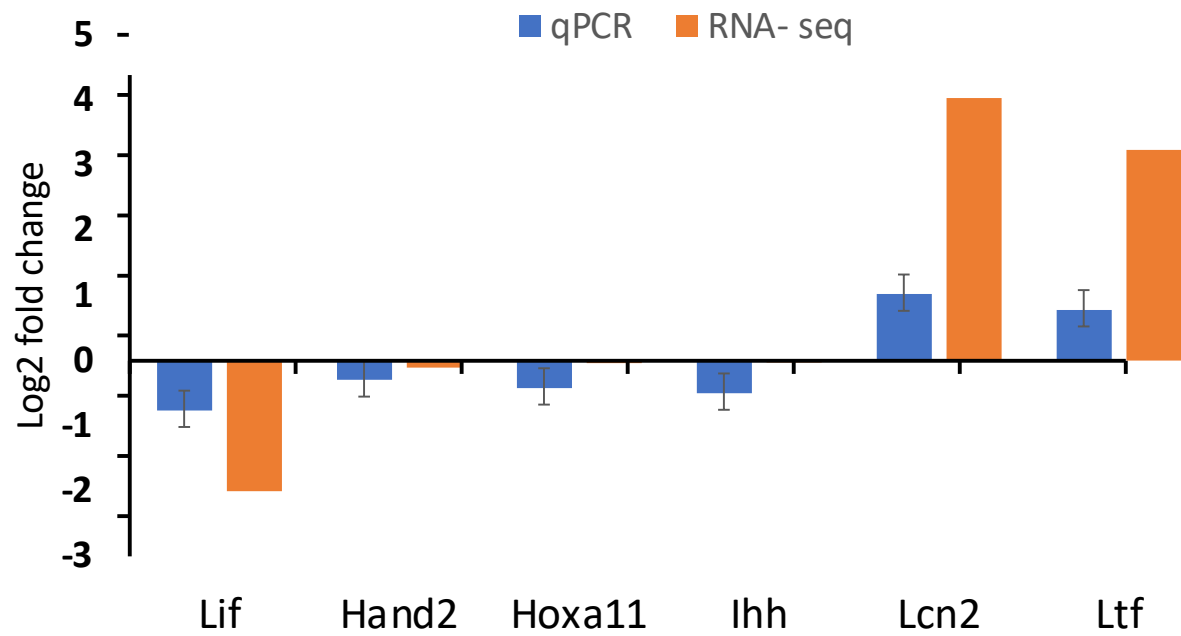**B**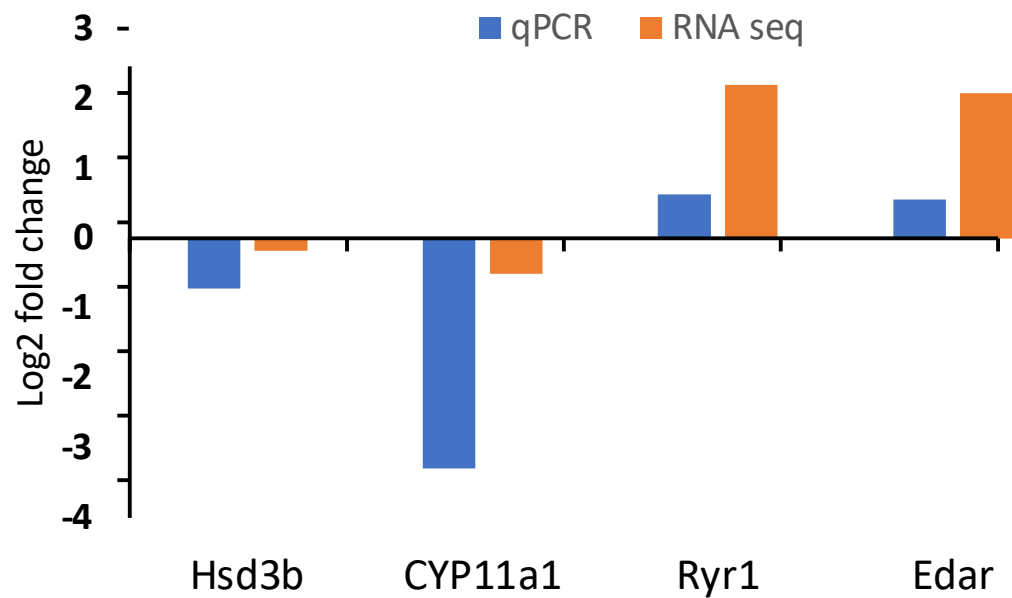

**Figure S2: Validation of RNA-seq data by quantitative PCR (qPCR). (A) Uterus, (B) Ovary.**
